# Supplementary material for: Yap/Taz promote the scavenging of extracellular nutrients through macropinocytosis
Source: PubMed Central journal article supplement — Genes Dev. 2020 Oct 1;34(19-20):1345–58. doi: 10.1101/gad.340661.120 (PMC7528706; doi:10.1101/gad.340661.120), 2020-10-01
Supplement: supp_gad.340661.120_Supplemental_Data.pdf [file supp_gad.340661.120_Supplemental_Data.pdf]

# Supplemental Fig. S1

A

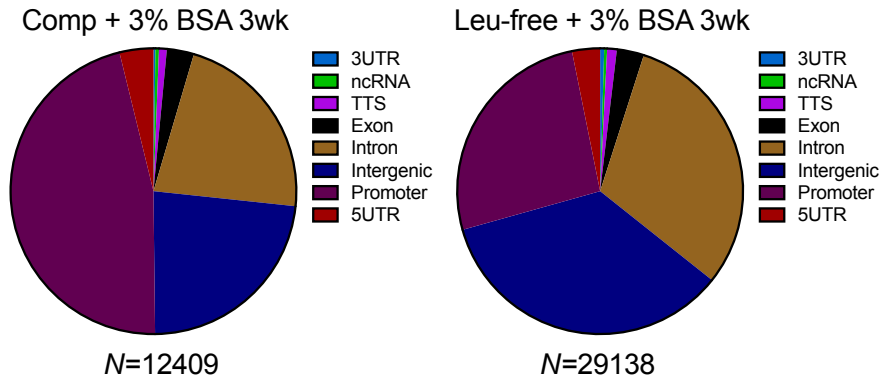

B

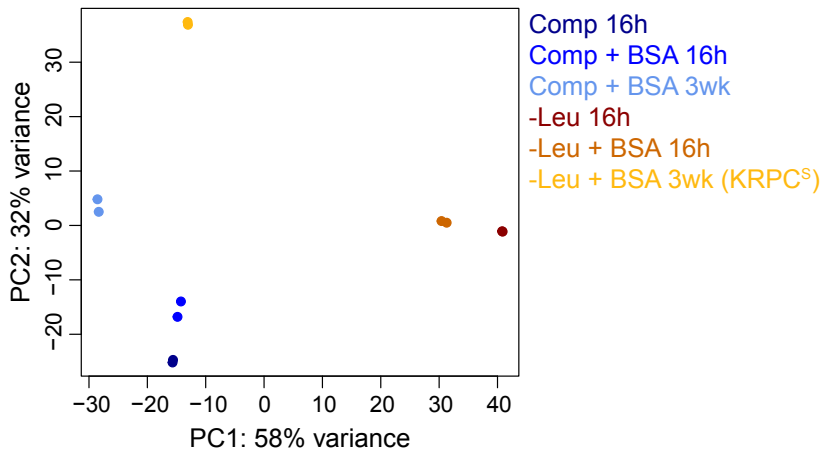

**Supplemental Fig. S1: Selection for extracellular protein-dependent growth is associated with increased chromatin accessibility and a distinct transcriptional program.**

**a**, Pie chart depicting frequency of ATAC-seq peaks within annotated genomic regions in KRPC cells cultured for 21d in either complete or leucine-free medium supplemented with 3% BSA. **b**, Principal component analysis (PCA) plot of gene expression KRPC cells cultured in either complete or leucine-free medium, for 16h or 21d +/- 3% BSA, as measured by RNA-seq, in biological duplicates.

## Supplemental Fig. S2

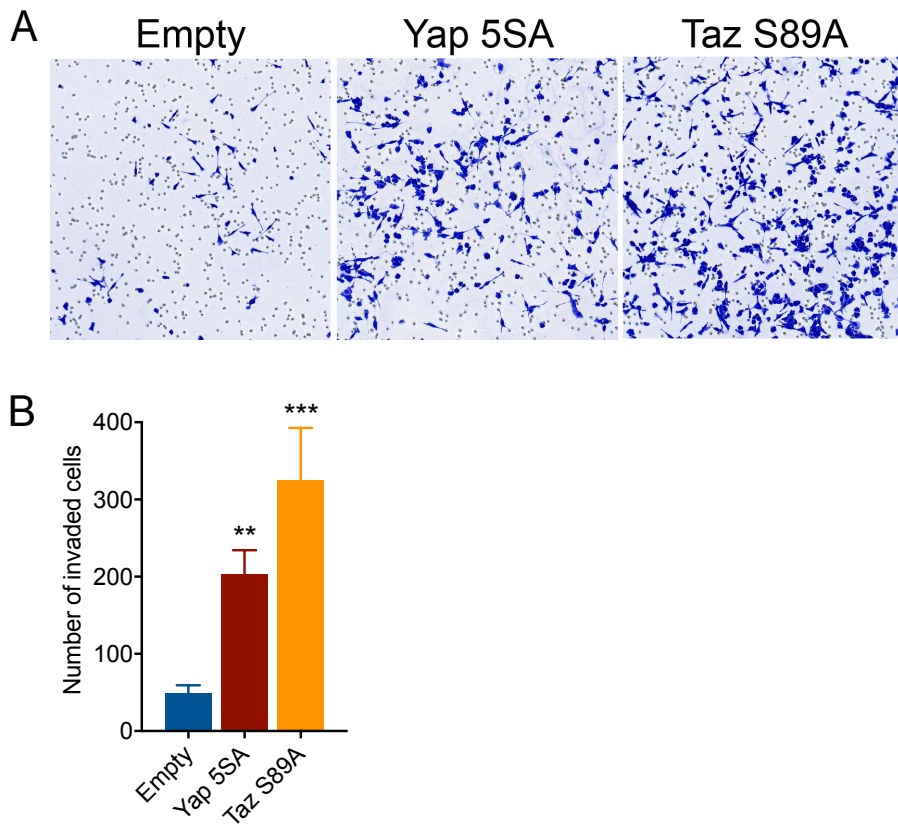

**Supplemental Fig. S2: Expression of constitutively nuclear Yap/Taz promotes invasion by PDA cells.** **a**, Bright-field images showing invasion of parental KRPC cells transduced with retroviruses expressing doxycycline-inducible Yap or Taz cDNAs across matrigel-coated membranes. Assay was performed after 48h of culture in 100 ng/ml doxycycline. **b**, Bar plot represents mean  $\pm$  s.e.m. of number of invaded cells counted per field across three biological replicates. \*\*\* $p < 0.0001$ , \*\* $p < 0.005$ , one-way ANOVA.

# Supplemental Fig. S3

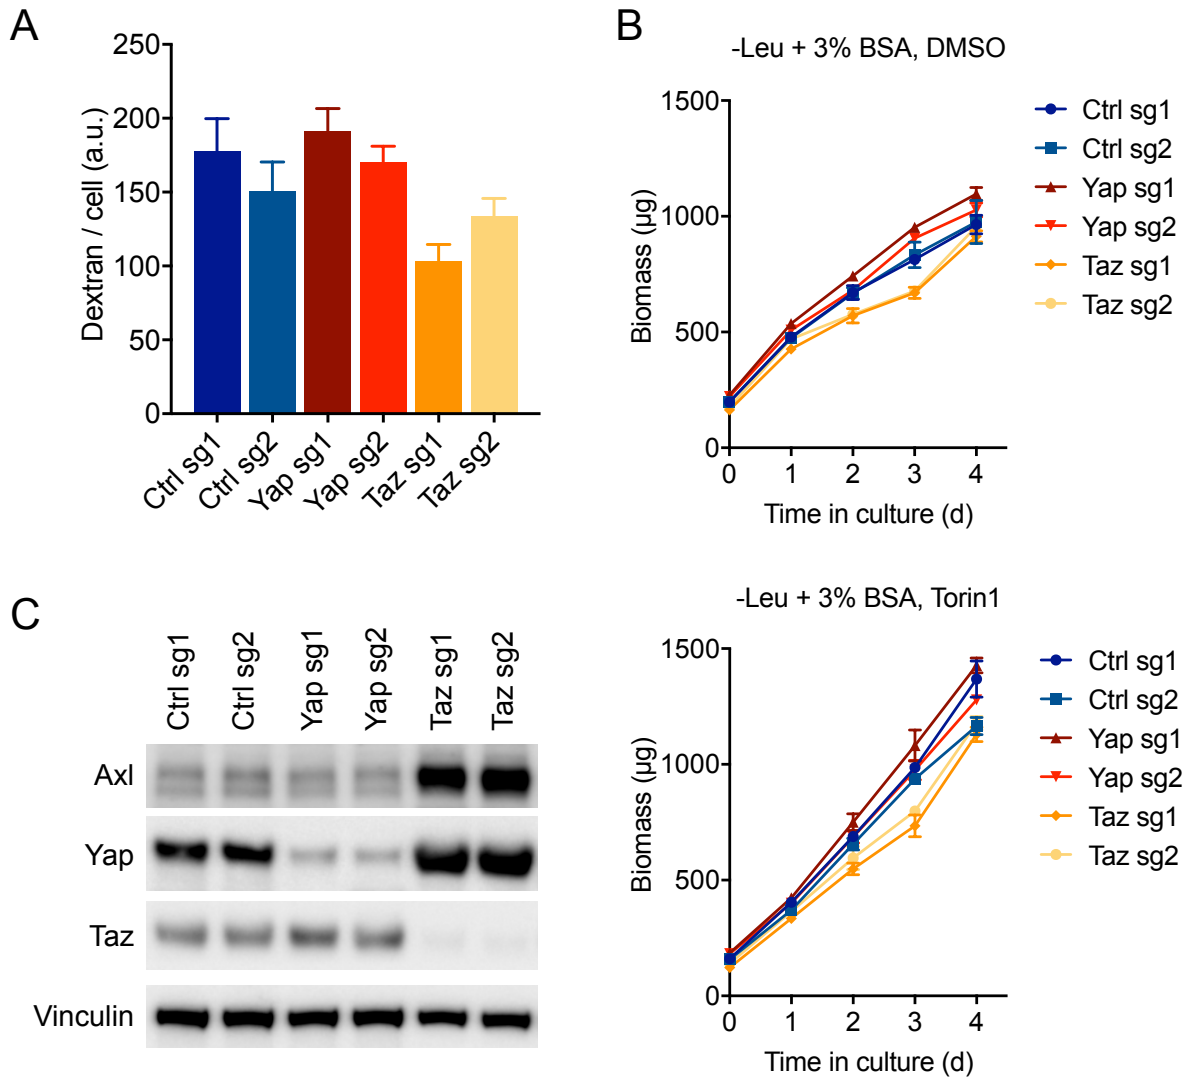

## Supplemental Fig. S3: Loss of Yap or Taz alone does not impair macropinocytosis or albumin-dependent growth in PDA cells.

**a**, Uptake of fluorescent dextran by KRPC cells transduced with lentiviruses expressing Cas9 and sgRNAs targeting Yap, Taz or control genomic loci, as measured by fluorescence confocal microscopy. Bars represent mean  $\pm$  s.e.m. fluorescence intensity per cell, across 12 fields of view. **b**, Growth of KRPC cells transduced with lentiviruses expressing Cas9 and sgRNAs targeting Yap, Taz or control genomic loci in leucine-free medium supplemented with 3% BSA  $\pm$  Torin1 (250nM). **c**, Immunoblot of whole cell lysates from KRPC cells transduced with lentiviruses expressing Cas9 and sgRNAs targeting Yap, Taz or control genomic loci.

## Supplemental Fig. S4

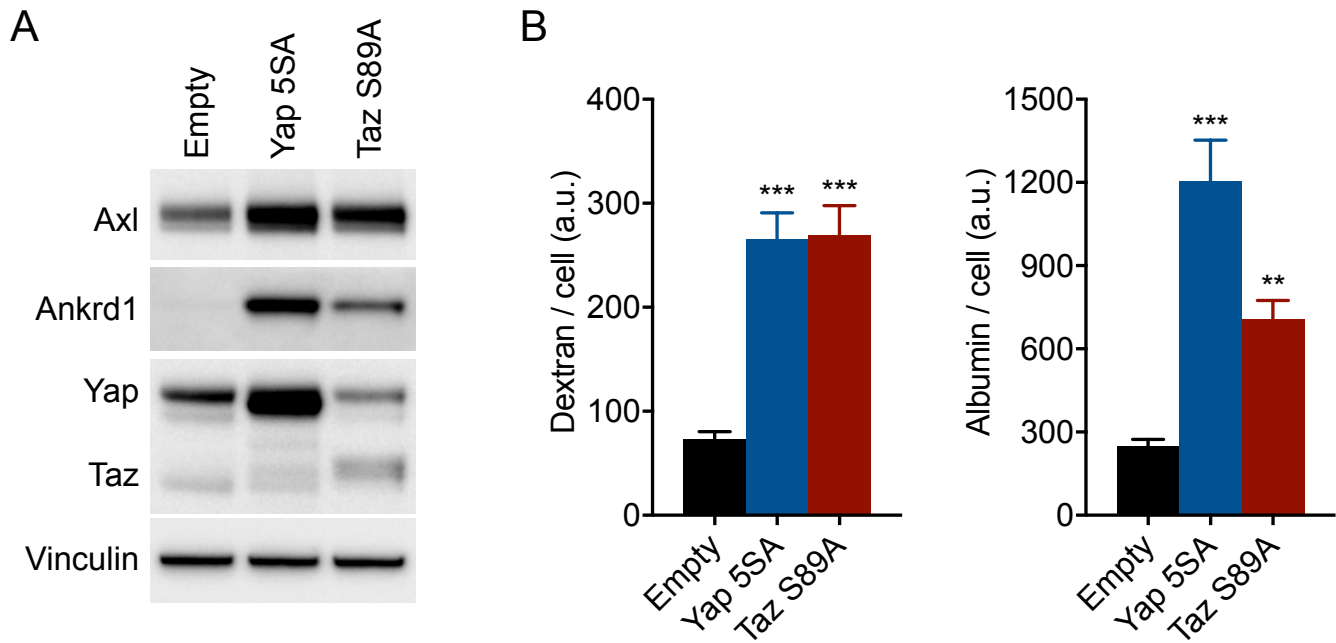

### Supplemental Fig. S4: Expression of constitutively nuclear Yap/Taz promotes macropinocytosis and albumin uptake in Ras wild-type PDA cells.

**a**, Immunoblot of whole cell lysates from BxPC-3 cells transduced with retroviruses expressing a dox-inducible Yap or Taz mutant cDNA or empty vector control after 24h of culture in 100ng/ml doxycycline. **b**, Bar plots represent mean uptake per cell  $\pm$  s.e.m. of fluorescently-labeled 70kDa dextran (left) and albumin (right) in 30 min by BxPC-3 cells described in **a**.

# Supplemental Fig. S5

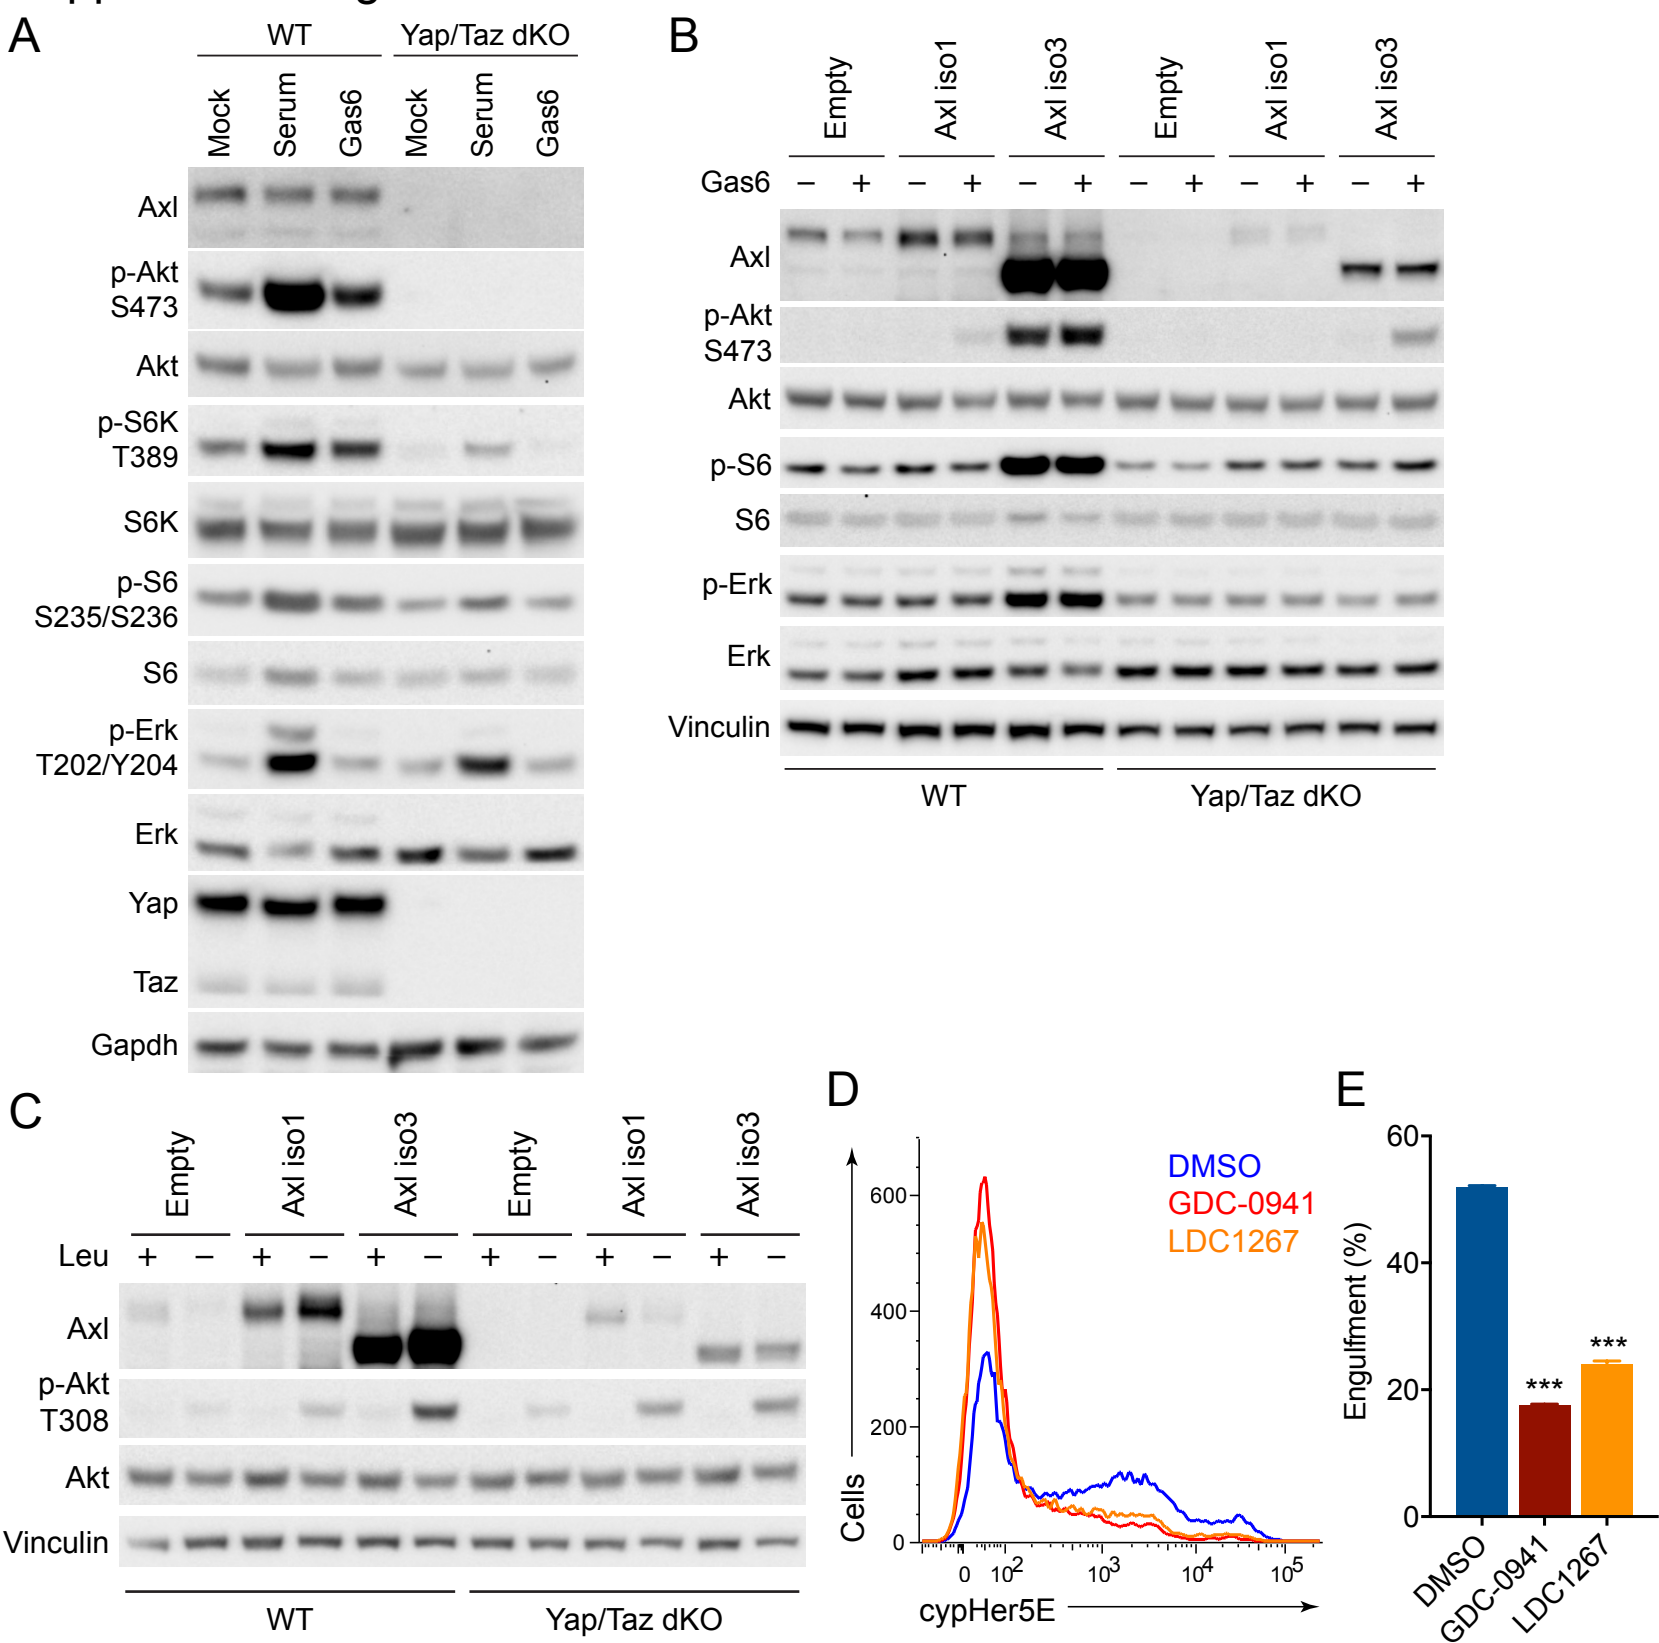

**Supplemental Fig. S5: Yap/Taz-dependent expression of Axl promotes PI3-kinase activation and uptake of necrotic cells through macropinocytosis.** **a**, Immunoblot of whole cell lysates from WT or Yap/Taz dKO KRPC cells following 8h of serum starvation in 0.1% FBS and 15 min treatment +/- 10% FBS or recombinant Gas6 (400 ng/ml). **b**, Immunoblot of whole cell lysates from WT or Yap/Taz dKO KRPC cells transduced with retroviruses expressing a doxycycline-inducible mouse Axl (isoform 1 or 3) cDNA, following 8h of serum starvation in 0.1% FBS and 15 min +/- recombinant Gas6 (400 ng/ml). Cells were cultured in 100 ng/ml doxycycline for 16h prior and during serum starvation. **c**, Immunoblot of whole cell lysates from WT or Yap/Taz dKO KRPC cells transduced with retroviruses expressing a doxycycline-inducible mouse Axl (isoform 1 or 3) cDNA cultured for 24h in complete or leucine-free medium supplemented with 3% BSA and 100 ng/ml doxycycline. **d**, Histogram showing engulfment of cypHer5E-stained necrotic FL5.12 cells by KRPC cells after 4h in the presence of 1 $\mu$ M GDC-0941, 100nM LDC1267 or vehicle, as measured by flow cytometry. Bar plot (**e**) represents mean +/- s.d. of cypHer5E-positive cells from three technical replicates. \*\*\* $p < 0.0001$ , one-way ANOVA.
